# Supplementary material
Source: Royal Society of Chemistry journal article supplement (doi:10.1039/d6cp00698a)
Supplement: d6cp00698a1.zip [file SI_P4O.pdf › SI_P4O.pdf]

# Supplementary Information for “Resolving the Trifecta of Discrepancies Regarding the Phosphorus Suboxide P<sub>4</sub>O”

Ethan J. Poncelet, Alexander G. Heide, Mitchell E. Lahm, Henry F. Schaefer III, and Yohannes Abate

May 2026

## Vibrational Frequencies

Table S1: Computed Vibrational Frequencies (cm<sup>-1</sup>) and Harmonic Intensities (km mol<sup>-1</sup>) for C-P<sub>4</sub>O.

| Sym.           | Fund. | Intensity | Isotope Fund. | CCSD(T) Harm. | CCSD(T) Isotope Harm. | B3LYP Harm. | B3LYP $\delta$ VPT2 |
|----------------|-------|-----------|---------------|---------------|-----------------------|-------------|---------------------|
| a <sub>2</sub> | 201.0 | 0         | 201.0         | 202.4         | 202.4                 | 207.0       | -1.5                |
| b <sub>1</sub> | 298.2 | 3         | 287.0         | 300.0         | 288.8                 | 307.2       | -1.8                |
| b <sub>2</sub> | 299.0 | 1         | 298.8         | 301.0         | 300.8                 | 311.1       | -2.1                |
| a <sub>1</sub> | 431.7 | 8         | 422.8         | 434.5         | 425.7                 | 430.0       | -2.9                |
| a <sub>1</sub> | 459.5 | 9         | 457.6         | 463.9         | 462.0                 | 461.5       | -4.4                |
| a <sub>1</sub> | 537.4 | 3         | 536.9         | 542.3         | 541.8                 | 533.0       | -4.9                |
| b <sub>2</sub> | 561.1 | 9         | 561.1         | 566.8         | 566.8                 | 559.3       | -5.7                |
| a <sub>1</sub> | 651.3 | 34        | 634.5         | 652.7         | 635.8                 | 639.4       | -1.3                |
| b <sub>2</sub> | 787.1 | 33        | 752.5         | 806.3         | 770.8                 | 784.1       | -19.2               |

Table S2: Computed Vibrational Frequencies (cm<sup>-1</sup>) and Harmonic Intensities (km mol<sup>-1</sup>) for B-P<sub>4</sub>O.

| Sym.           | Fund. | Intensity | Isotope Fund. | CCSD(T) Harm. | CCSD(T) Isotope Harm. | B3LYP Harm. | B3LYP $\delta$ VPT2 |
|----------------|-------|-----------|---------------|---------------|-----------------------|-------------|---------------------|
| b <sub>1</sub> | 316.1 | 4         | 304.3         | 320.1         | 308.1                 | 318.6       | -4.0                |
| a <sub>1</sub> | 327.0 | <1        | 325.1         | 332.1         | 330.2                 | 329.6       | -5.1                |
| a <sub>2</sub> | 332.1 | 0         | 332.1         | 335.1         | 335.1                 | 329.6       | -3.0                |
| b <sub>1</sub> | 414.4 | 3         | 414.3         | 418.7         | 418.7                 | 410.2       | -4.3                |
| a <sub>1</sub> | 426.1 | 2         | 423.0         | 430.0         | 426.9                 | 423.7       | -3.9                |
| b <sub>2</sub> | 443.0 | 9         | 442.9         | 448.6         | 448.5                 | 439.4       | -5.6                |
| a <sub>1</sub> | 550.7 | 5         | 550.4         | 556.1         | 555.8                 | 546.3       | -5.4                |
| b <sub>2</sub> | 641.8 | 30        | 617.3         | 656.3         | 631.3                 | 642.4       | -14.5               |
| a <sub>1</sub> | 739.9 | 58        | 712.1         | 747.0         | 718.9                 | 739.2       | -7.1                |

Table S3: Computed Vibrational Frequencies (cm<sup>-1</sup>) and Harmonic Intensities (km mol<sup>-1</sup>) for T-P<sub>4</sub>O.

| Sym.           | Fund.  | Intensity | Isotope Fund. | CCSD(T) Harm. | CCSD(T) Isotope Harm. | B3LYP Harm. | B3LYP $\delta$ VPT2 |
|----------------|--------|-----------|---------------|---------------|-----------------------|-------------|---------------------|
| e              | 246.8  | 10        | 239.8         | 248.6         | 241.5                 | 246.1       | -1.8                |
| e              | 321.0  | 1         | 320.9         | 325.5         | 325.4                 | 323.2       | -4.5                |
| a <sub>1</sub> | 395.5  | <1        | 391.4         | 400.0         | 395.9                 | 396.8       | -4.5                |
| e              | 494.4  | 6         | 494.1         | 501.4         | 501.1                 | 497.4       | -6.9                |
| a <sub>1</sub> | 555.3  | <1        | 550.4         | 562.5         | 557.6                 | 557.7       | -7.2                |
| a <sub>1</sub> | 1258.5 | 143       | 1218.2        | 1274.1        | 1233.3                | 1267.2      | -15.6               |

Table S4: Computed Vibrational Frequencies ( $\text{cm}^{-1}$ ) and Harmonic Intensities ( $\text{km mol}^{-1}$ ) for  $D_{2d}$ -symmetry  $\text{P}_4\text{O}_2$ .

| Sym.           | Fund.  | Intensity | Isotope Fund. | CCSD(T) Harm. | CCSD(T) Isotope Harm. | B3LYP Harm. | B3LYP $\delta\text{VPT2}$ |
|----------------|--------|-----------|---------------|---------------|-----------------------|-------------|---------------------------|
| e              | 233.27 | 2         | 224.13        | 237.54        | 228.23                | 239.31      | -4.27                     |
| a <sub>1</sub> | 348.26 | 0         | 344.23        | 355.88        | 351.77                | 352.39      | -7.62                     |
| b <sub>1</sub> | 353.52 | 0         | 353.52        | 358.45        | 358.45                | 353.14      | -4.93                     |
| e              | 398.55 | 2         | 397.93        | 403.94        | 403.31                | 395.95      | -5.39                     |
| b <sub>2</sub> | 422.24 | 1         | 419.38        | 429.55        | 426.64                | 424.10      | -7.31                     |
| a <sub>1</sub> | 504.93 | 0         | 501.19        | 507.63        | 503.87                | 493.96      | -2.71                     |
| e              | 654.01 | 23        | 628.68        | 666.11        | 640.31                | 652.06      | -12.10                    |
| a <sub>1</sub> | 724.58 | 0         | 696.28        | 732.28        | 703.68                | 726.06      | -7.70                     |
| b <sub>2</sub> | 729.76 | 91        | 701.55        | 739.69        | 711.09                | 733.53      | -9.93                     |

## Geometries (in angstrom)

### Cyclic $\text{P}_4\text{O}$ , CCSD(T)/cc-pV(T+d)Z

|   |          |           |           |
|---|----------|-----------|-----------|
| P | 0.000000 | -1.481222 | 0.812515  |
| P | 0.000000 | -1.082799 | -1.212523 |
| P | 0.000000 | 1.481222  | 0.812515  |
| P | 0.000000 | 1.082799  | -1.212523 |
| O | 0.000000 | 0.000000  | 1.536835  |

### Bridge-Bonded $\text{P}_4\text{O}$ , CCSD(T)/cc-pV(T+d)Z

|   |           |           |           |
|---|-----------|-----------|-----------|
| P | 0.000000  | -1.119500 | 0.964412  |
| P | 1.245722  | 0.000000  | -0.534651 |
| P | -1.245722 | 0.000000  | -0.534651 |
| P | 0.000000  | 1.119500  | 0.964412  |
| O | 0.000000  | 0.000000  | -1.679452 |

### Terminal $\text{P}_4\text{O}$ , CCSD(T)/cc-pV(T+d)Z

|   |           |           |           |
|---|-----------|-----------|-----------|
| P | 0.663894  | -1.149898 | -0.731375 |
| P | 0.000000  | 0.000000  | 0.939617  |
| P | 0.663894  | 1.149898  | -0.731375 |
| P | -1.327788 | 0.000000  | -0.731375 |
| O | 0.000000  | 0.000000  | 2.418162  |

**D<sub>2d</sub>-Symmetry P<sub>4</sub>O<sub>2</sub>, CCSD(T)/cc-pV(T+d)Z**

|   |           |           |           |
|---|-----------|-----------|-----------|
| P | -0.903365 | -0.903365 | 0.723431  |
| P | 0.903365  | 0.903365  | 0.723431  |
| P | 0.903365  | -0.903365 | -0.723431 |
| P | -0.903365 | 0.903365  | -0.723431 |
| O | 0.000000  | 0.000000  | 1.838283  |
| O | 0.000000  | 0.000000  | -1.838283 |

**Terminal P<sub>4</sub>O, CCSD/cc-pV(T+d)Z**

|   |           |           |           |
|---|-----------|-----------|-----------|
| P | -0.659058 | -1.141522 | 0.726345  |
| P | 0.000000  | 0.000000  | -0.936443 |
| P | -0.659058 | 1.141522  | 0.726345  |
| P | 1.318116  | 0.000000  | 0.726345  |
| O | 0.000000  | 0.000000  | -2.406249 |

**Transition State (Terminal→Intermediate), 271*i* cm<sup>-1</sup>, CCSD/cc-pV(T+d)Z**

|   |           |           |           |
|---|-----------|-----------|-----------|
| P | -0.514364 | 0.764906  | 1.163420  |
| P | -0.393151 | -1.070185 | 0.000000  |
| P | -0.514364 | 0.764906  | -1.163420 |
| P | 1.301587  | 0.781955  | 0.000000  |
| O | 0.232944  | -2.404291 | 0.000000  |

**Intermediate, CCSD/cc-pV(T+d)Z**

|   |           |           |           |
|---|-----------|-----------|-----------|
| P | -0.452712 | 0.791185  | 1.153644  |
| P | -0.579246 | -1.214443 | 0.000000  |
| P | -0.452712 | 0.791185  | -1.153644 |
| P | 1.313842  | 0.855194  | 0.000000  |
| O | 0.330804  | -2.368542 | 0.000000  |

**Transition State (Intermediate→Bridge-Bonded),  $382i\text{ cm}^{-1}$ , CCSD/cc-pV(T+d)Z**

|   |           |           |           |
|---|-----------|-----------|-----------|
| P | -0.444072 | -0.866406 | 1.143067  |
| P | -0.700405 | 1.156561  | 0.000000  |
| P | 1.283227  | -0.430824 | 0.000000  |
| P | -0.444072 | -0.866406 | -1.143067 |
| O | 0.591248  | 1.950177  | 0.000000  |

**Bridge-Bonded P<sub>4</sub>O, CCSD/cc-pV(T+d)Z**

|   |           |           |           |
|---|-----------|-----------|-----------|
| P | 0.000000  | -1.112973 | 0.956750  |
| P | 1.245352  | 0.000000  | -0.528521 |
| P | -1.245352 | 0.000000  | -0.528521 |
| P | 0.000000  | 1.112973  | 0.956750  |
| O | 0.000000  | 0.000000  | -1.658772 |
